# Supplementary material
Source: MDPI journal article supplement (https://www.mdpi.com/1424-2818/16/3/174)
Supplement: s1 [file s1]

**Table S1.** Species list and abundance (individuals/m<sup>3</sup>) of the mesozooplankton of the eleven stations (B004 to B44) in the Ross Sea region Marine Protected Area (RSR MPA).

|                               | B04   | B11  | B16   | B18  | B26  | B29   | B33  | B35  | B38   | B41  | B44  |
|-------------------------------|-------|------|-------|------|------|-------|------|------|-------|------|------|
| Cnidaria indet.               |       |      |       |      |      |       |      |      |       | 0.09 |      |
| Siphonophore 1                |       | 0.21 | 1.32  |      | 0.06 | 1.26  | 0.33 | 0.09 | 1.26  | 1.02 |      |
| Siphonophore 2                | 0.27  | 0.24 |       | 0.21 | 0.42 | 0.51  | 0.18 | 0.24 | 0.48  | 0.24 | 0.06 |
| Siphonophore 3                | 0.03  |      |       |      |      |       |      |      |       |      |      |
| Hydrozoa indet.               |       | 0.06 |       |      |      | 0.18  | 0.09 |      | 0.03  |      | 0.06 |
| <i>Sagitta</i> sp.            | 3.81  | 0.03 |       |      | 0.03 | 0.27  |      | 0.12 | 0.57  | 0.9  | 0.06 |
| <i>Limacina rangii</i>        |       | 0.06 | 1.23  | 0.51 | 0.21 | 0.66  | 0.6  | 0.45 | 0.12  | 0.06 | 0.09 |
| <i>Clione antarctica</i>      | 0.06  | 0.03 | 0.12  |      |      | 0.03  | 0.18 | 0.06 | 0.09  | 0.03 |      |
| Polychaeta larvae             | 0.99  | 0.09 | 0.09  |      | 0.06 | 0.09  | 0.6  | 0.15 | 0.45  | 1.56 | 0.21 |
| Crustaceans nauplius          | 0.87  |      |       |      |      | 0.06  |      |      | 0.48  | 0.03 | 1.56 |
| Cirriped nauplius             | 0.24  |      |       |      | 0.03 | 0.15  | 0.03 |      |       | 40.8 | 0.15 |
| Ostracoda indet.              | 1.47  | 0.03 |       |      | 0.09 | 0.75  | 0.66 | 0.3  |       | 1.32 | 0.12 |
| <i>Calanoides acutus</i>      | 10.47 | 2.07 | 7.02  | 0.54 | 0.75 | 5.1   | 8.4  | 4.98 | 2.94  | 2.22 | 0.66 |
| <i>Calanus propinquus</i>     | 0.51  | 0.03 | 0.15  |      | 0.03 | 0.03  | 0.12 |      | 0.06  |      |      |
| <i>Ctenocalanus citer</i>     | 0.72  |      | 0.03  |      |      | 0.09  | 0.03 | 0.12 | 0.18  | 0.18 | 0.09 |
| <i>Haloptilus oxycephalus</i> |       |      |       |      |      |       |      |      |       |      |      |
| <i>Metridia gerlachei</i>     | 14.16 | 0.3  | 13.86 | 0.12 | 1.92 | 14.31 | 8.64 | 9.6  | 11.16 | 3.54 | 6.15 |
| <i>Microcalanus pygmaeus</i>  | 0.09  |      |       |      |      |       |      |      |       | 0.03 |      |
| <i>Oithona</i> spp.           | 49.2  | 0.06 |       |      | 0.42 | 0.21  | 0.03 | 0.09 | 0.15  | 1.41 | 7.02 |
| <i>Triconia antarctica</i>    | 45.36 | 0.03 |       |      |      |       | 0.03 | 0.18 |       | 0.09 | 2.94 |

|                                   |        |      |       |      |      |       |       |       |       |       |       |
|-----------------------------------|--------|------|-------|------|------|-------|-------|-------|-------|-------|-------|
| <i>Paraeuchaeta antarctica</i>    | 7.62   | 0.99 | 1.92  | 0.33 | 3.36 | 3.72  | 2.04  |       | 2.64  | 2.22  | 0.69  |
| <i>Racovitzanus antarcticus</i>   | 0.27   |      |       |      | 0.03 | 0.03  | 0.03  |       |       | 0.39  |       |
| <i>Rhincalanus gigas</i>          | 0.27   |      |       |      |      |       |       |       |       |       |       |
| Copepoda indet.                   | 0.03   |      |       |      |      |       |       |       |       | 0.03  |       |
| <i>Euphausia</i> egg              | 0.03   |      |       |      | 0.03 |       |       |       | 0.06  | 0.45  | 1.23  |
| <i>Euphausia</i> nauplius         |        |      |       |      |      |       |       |       |       | 0.06  |       |
| <i>Euphausia</i> metanauplius     |        |      |       |      | 0.03 |       |       |       |       |       |       |
| <i>Euphausia</i> calyptopis       | 0.15   |      |       |      |      | 0.54  | 2.46  | 4.86  | 1.8   | 0.24  | 0.12  |
| <i>Euphausia</i> furcilia         | 0.09   |      | 0.21  | 0.33 |      |       | 0.03  | 0.06  | 0.06  | 0.06  | 0.03  |
| <i>Euphausia</i> crystallorophias |        | 0.09 | 0.15  |      | 1.71 | 0.24  |       | 0.06  | 0.3   |       | 0.21  |
| <i>Thysanoessa</i> sp.            | 0.06   |      |       |      |      |       |       |       |       |       |       |
| <i>Hyperietta dilatata</i>        | 0.15   | 0.03 | 0.15  | 0.18 | 0.12 | 0.09  | 0.09  | 0.06  | 0.09  |       |       |
| <i>Pseudorchomene plebs</i>       |        |      | 0.06  | 0.06 | 0.06 | 0.03  |       | 0.06  | 0.09  | 0.06  | 0.15  |
| Mysidae indet.                    | 0.03   |      |       |      |      |       |       |       |       |       |       |
| Appendicularia indet.             | 2.22   |      |       |      |      | 0.66  | 0.48  | 0.09  | 1.08  | 2.88  | 2.85  |
| <i>Salp thompsoni</i>             |        |      | 0.03  |      |      |       |       |       |       |       |       |
| Fish larvae                       |        | 0.45 |       | 0.66 |      |       |       | 0.03  |       |       |       |
| Abundance (inds./m <sup>3</sup> ) | 139.17 | 4.80 | 26.34 | 2.94 | 9.36 | 29.01 | 25.05 | 21.60 | 24.09 | 59.91 | 24.45 |
| No. of taxon                      | 26     | 17   | 14    | 9    | 18   | 22    | 20    | 19    | 21    | 25    | 20    |

**Table S2.** Species list and abundance (individuals/m<sup>3</sup>) of the mesozooplankton of the eleven stations (B046 to B80) in the Ross Sea region Marine Protected Area (RSR MPA).

|                               | B46   | B50  | B52   | B55  | B57  | B61   | B67  | B69  | B71   | B77  | B80  |
|-------------------------------|-------|------|-------|------|------|-------|------|------|-------|------|------|
| Cnidaria indet.               |       |      |       |      |      |       |      |      |       | 0.09 |      |
| Siphonophore 1                |       | 0.21 | 1.32  |      | 0.06 | 1.26  | 0.33 | 0.09 | 1.26  | 1.02 |      |
| Siphonophore 2                | 0.27  | 0.24 |       | 0.21 | 0.42 | 0.51  | 0.18 | 0.24 | 0.48  | 0.24 | 0.06 |
| Siphonophore 3                | 0.03  |      |       |      |      |       |      |      |       |      |      |
| Hydrozoa indet.               |       | 0.06 |       |      |      | 0.18  | 0.09 |      | 0.03  |      | 0.06 |
| <i>Sagitta</i> sp.            | 3.81  | 0.03 |       |      | 0.03 | 0.27  |      | 0.12 | 0.57  | 0.9  | 0.06 |
| <i>Limacina rangii</i>        |       | 0.06 | 1.23  | 0.51 | 0.21 | 0.66  | 0.6  | 0.45 | 0.12  | 0.06 | 0.09 |
| <i>Clione antarctica</i>      | 0.06  | 0.03 | 0.12  |      |      | 0.03  | 0.18 | 0.06 | 0.09  | 0.03 |      |
| Polychaeta larvae             | 0.99  | 0.09 | 0.09  |      | 0.06 | 0.09  | 0.6  | 0.15 | 0.45  | 1.56 | 0.21 |
| Crustaceans nauplius          | 0.87  |      |       |      |      | 0.06  |      |      | 0.48  | 0.03 | 1.56 |
| Cirriped nauplius             | 0.24  |      |       |      | 0.03 | 0.15  | 0.03 |      |       | 40.8 | 0.15 |
| Ostracoda indet.              | 1.47  | 0.03 |       |      | 0.09 | 0.75  | 0.66 | 0.3  |       | 1.32 | 0.12 |
| <i>Calanoides acutus</i>      | 10.47 | 2.07 | 7.02  | 0.54 | 0.75 | 5.1   | 8.4  | 4.98 | 2.94  | 2.22 | 0.66 |
| <i>Calanus propinquus</i>     | 0.51  | 0.03 | 0.15  |      | 0.03 | 0.03  | 0.12 |      | 0.06  |      |      |
| <i>Ctenocalanus citer</i>     | 0.72  |      | 0.03  |      |      | 0.09  | 0.03 | 0.12 | 0.18  | 0.18 | 0.09 |
| <i>Haloptilus oxycephalus</i> |       |      |       |      |      |       |      |      |       |      |      |
| <i>Metridia gerlachei</i>     | 14.16 | 0.3  | 13.86 | 0.12 | 1.92 | 14.31 | 8.64 | 9.6  | 11.16 | 3.54 | 6.15 |
| <i>Microcalanus pygmaeus</i>  | 0.09  |      |       |      |      |       |      |      |       | 0.03 |      |
| <i>Oithona</i> spp.           | 49.2  | 0.06 |       |      | 0.42 | 0.21  | 0.03 | 0.09 | 0.15  | 1.41 | 7.02 |

|                                   |       |       |       |       |       |       |       |       |       |       |       |
|-----------------------------------|-------|-------|-------|-------|-------|-------|-------|-------|-------|-------|-------|
| <i>Triconia antarctica</i>        | 45.36 | 0.03  |       |       |       |       | 0.03  | 0.18  |       | 0.09  | 2.94  |
| <i>Paraeuchaeta antarctica</i>    | 7.62  | 0.99  | 1.92  | 0.33  | 3.36  | 3.72  | 2.04  |       | 2.64  | 2.22  | 0.69  |
| <i>Racovitzanus antarcticus</i>   | 0.27  |       |       |       | 0.03  | 0.03  | 0.03  |       |       | 0.39  |       |
| <i>Rhincalanus gigas</i>          | 0.27  |       |       |       |       |       |       |       |       |       |       |
| Copepoda indet.                   | 0.03  |       |       |       |       |       |       |       |       | 0.03  |       |
| <i>Euphausia</i> egg              | 0.03  |       |       |       | 0.03  |       |       |       | 0.06  | 0.45  | 1.23  |
| <i>Euphausia</i> nauplius         |       |       |       |       |       |       |       |       |       | 0.06  |       |
| <i>Euphausia</i> metanauplius     |       |       |       |       | 0.03  |       |       |       |       |       |       |
| <i>Euphausia</i> calyptopis       | 0.15  |       |       |       |       | 0.54  | 2.46  | 4.86  | 1.8   | 0.24  | 0.12  |
| <i>Euphausia</i> furcilia         | 0.09  |       | 0.21  | 0.33  |       |       | 0.03  | 0.06  | 0.06  | 0.06  | 0.03  |
| <i>Euphausia</i> crystallorophias |       | 0.09  | 0.15  |       | 1.71  | 0.24  |       | 0.06  | 0.3   |       | 0.21  |
| <i>Thysanoessa</i> sp.            | 0.06  |       |       |       |       |       |       |       |       |       |       |
| <i>Hyperietta dilatata</i>        | 0.15  | 0.03  | 0.15  | 0.18  | 0.12  | 0.09  | 0.09  | 0.06  | 0.09  |       |       |
| <i>Pseudorchomene plebs</i>       |       |       | 0.06  | 0.06  | 0.06  | 0.03  |       | 0.06  | 0.09  | 0.06  | 0.15  |
| Mysidae indet.                    | 0.03  |       |       |       |       |       |       |       |       |       |       |
| Appendicularia indet.             | 2.22  |       |       |       |       | 0.66  | 0.48  | 0.09  | 1.08  | 2.88  | 2.85  |
| <i>Salp thompsoni</i>             |       |       | 0.03  |       |       |       |       |       |       |       |       |
| Fish larvae                       |       | 0.45  |       | 0.66  |       |       |       | 0.03  |       |       |       |
| Abundance (inds./m <sup>3</sup> ) | 6.63  | 17.28 | 30.72 | 52.65 | 23.55 | 38.25 | 31.20 | 75.51 | 57.24 | 49.53 | 26.34 |
| No. of taxon                      | 26    | 17    | 14    | 9     | 18    | 22    | 20    | 19    | 21    | 25    | 20    |

**Table S3.** SIMPER analysis results showing species that contribute to the group similarity, respectively.

| Group A<br>(average similarity: 52.23) | Av. Abund. | Av. sim. | Contrib.% | Cum.% |
|----------------------------------------|------------|----------|-----------|-------|
| <i>Calanoides acutus</i>               | 1.01       | 11.01    | 21.08     | 21.08 |
| <i>Paraeuchaeta antarctica</i>         | 1.13       | 9.89     | 18.93     | 40.02 |
| Siphonophore 2                         | 0.53       | 6.66     | 12.76     | 52.77 |
| <i>Metridia gerlachei</i>              | 0.76       | 5.75     | 11.01     | 63.79 |
| <i>Limacina rangii</i>                 | 0.47       | 4.48     | 8.57      | 72.36 |
| Group B<br>(average similarity: 67.07) | Av. Abund. | Av. sim. | Contrib.% | Cum.% |
| <i>Metridia gerlachei</i>              | 5.03       | 16.82    | 25.09     | 25.09 |
| <i>Calanoides acutus</i>               | 2.85       | 8.85     | 13.20     | 38.28 |
| Ostracoda indet.                       | 1.83       | 6.49     | 9.68      | 47.96 |
| <i>Sagitta</i> sp.                     | 1.71       | 6.29     | 9.38      | 57.34 |
| <i>Calanus propinquus</i>              | 1.34       | 4.38     | 6.54      | 63.88 |
| <i>Paraeuchaeta antarctica</i>         | 1.47       | 3.77     | 5.62      | 69.50 |
| Polychaeta larvae                      | 0.94       | 3.72     | 5.54      | 75.04 |
| Group C<br>(average similarity: 57.75) | Av. Abund. | Av. sim. | Contrib.% | Cum.% |
| <i>Metridia gerlachei</i>              | 2.30       | 13.02    | 22.55     | 22.55 |
| Appendicularia indet.                  | 1.38       | 6.83     | 11.83     | 34.38 |
| <i>Paraeuchaeta antarctica</i>         | 1.11       | 6.35     | 11.00     | 45.38 |
| <i>Calanoides acutus</i>               | 0.96       | 5.28     | 9.14      | 54.53 |
| <i>Oithona</i> spp.                    | 1.23       | 3.66     | 6.33      | 60.86 |
| Polychaeta larvae                      | 0.65       | 2.99     | 5.17      | 66.03 |
| Ostracoda indet.                       | 0.65       | 2.90     | 5.02      | 71.05 |
| Group D<br>(average similarity: 64.92) | Av. Abund. | Av. sim. | Contrib.% | Cum.% |
| <i>Metridia gerlachei</i>              | 3.47       | 17.96    | 27.66     | 27.66 |
| <i>Calanoides acutus</i>               | 2.33       | 12.37    | 19.05     | 46.71 |
| <i>Euphausia calypopis</i>             | 2.08       | 7.92     | 12.19     | 58.91 |
| <i>Limacina rangii</i>                 | 1.04       | 4.56     | 7.03      | 65.93 |
| <i>Paraeuchaeta antarctica</i>         | 0.86       | 3.03     | 4.67      | 70.60 |

**Table S4.** SIMPER analysis results representing species that contribute to the dissimilarity between each group.

|                                                |                 |                 |              |               |       |
|------------------------------------------------|-----------------|-----------------|--------------|---------------|-------|
| Groups A & B<br>(average dissimilarity: 69.26) | A<br>Av. Abund. | B<br>Av. Abund. | Av.<br>Diss. | Contrib.<br>% | Cum.% |
| <i>Metridia gerlachei</i>                      | 0.76            | 5.03            | 14.12        | 20.38         | 20.38 |
| <i>Calanoides acutus</i>                       | 1.01            | 2.85            | 5.79         | 8.36          | 28.74 |
| Ostracoda indet.                               | 0.16            | 1.83            | 5.69         | 8.22          | 36.97 |
| <i>Sagitta</i> sp.                             | 0.12            | 1.71            | 5.09         | 7.36          | 44.32 |
| <i>Triconia antarctica</i>                     | 0.30            | 2.01            | 4.56         | 6.58          | 50.90 |
| Groups A & C<br>(average dissimilarity: 60.35) | A<br>Av. Abund. | C<br>Av. Abund. | Av.<br>Diss. | Contrib.<br>% | Cum.% |
| <i>Metridia gerlachei</i>                      | 0.76            | 2.30            | 7.42         | 12.29         | 12.29 |
| Appendicularia indet.                          | 0.00            | 1.38            | 6.06         | 10.04         | 22.33 |
| Cirriped nauplius                              | 0.06            | 1.8.            | 5.99         | 9.93          | 32.26 |
| <i>Oithona</i> spp.                            | 0.30            | 1.23            | 4.32         | 7.16          | 39.42 |
| <i>Triconia antarctica</i>                     | 0.06            | 0.71            | 3.00         | 4.97          | 44.38 |
| Fish larvae                                    | 0.49            | 0.00            | 2.50         | 4.15          | 48.53 |
| <i>Euphausia calyptopis</i>                    | 0.00            | 0.49            | 2.33         | 3.86          | 52.39 |
| Groups A & D<br>(average dissimilarity: 59.09) | A<br>Av. Abund. | D<br>Av. Abund. | Av.<br>Diss. | Contrib.<br>% | Cum.% |
| <i>Metridia gelachei</i>                       | 0.76            | 3.47            | 12.23        | 20.70         | 20.70 |
| <i>Euphausia calyptopis</i>                    | 0.00            | 2.08            | 9.15         | 15.49         | 36.20 |
| <i>Calanoides acutus</i>                       | 1.01            | 2.33            | 5.96         | 10.08         | 46.28 |
| <i>Paraeuchaeta antarctica</i>                 | 1.13            | 1.13            | 3.09         | 5.23          | 51.50 |
| Groups B & C<br>(average dissimilarity: 52.96) | B<br>Av. Abund. | C<br>Av. Abund. | Av.<br>Diss. | Contrib.<br>% | Cum.% |
| <i>Metridia gerlachei</i>                      | 5.03            | 2.30            | 7.18         | 13.55         | 13.55 |
| <i>Calanoides acutus</i>                       | 2.85            | 0.96            | 4.86         | 9.17          | 22.72 |
| <i>Oithona</i> spp.                            | 2.01            | 1.23            | 4.71         | 8.89          | 31.61 |
| <i>Triconia antarctica</i>                     | 1.89            | 0.71            | 4.18         | 7.89          | 39.50 |
| Cirriped nauplius                              | 0.12            | 1.80            | 3.84         | 7.26          | 46.75 |
| <i>Calanus propinquus</i>                      | 1.31            | 0.12            | 3.30         | 6.23          | 52.98 |
| Groups B & D<br>(average dissimilarity: 50.05) | B<br>Av. Abund. | D<br>Av. Abund. | Av.<br>Diss. | Contrib.<br>% | Cum.% |
| <i>Euphausia calyptopis</i>                    | 0.14            | 2.08            | 5.00         | 10.00         | 10.00 |
| <i>Metridia gerlachei</i>                      | 5.03            | 3.47            | 4.84         | 9.66          | 19.66 |
| Ostracoda indet.                               | 1.83            | 0.32            | 4.00         | 7.99          | 27.65 |
| <i>Oithona</i> spp.                            | 2.01            | 0.27            | 3.81         | 7.61          | 35.25 |
| <i>Triconia antarctica</i>                     | 1.89            | 0.12            | 3.75         | 7.49          | 42.74 |
| <i>Sagitta</i> sp.                             | 1.71            | 0.48            | 3.05         | 6.10          | 48.83 |
| <i>Calanus propinquus</i>                      | 1.34            | 0.24            | 2.97         | 5.93          | 54.77 |
| Groups C & D<br>(average dissimilarity: 49.23) | C<br>Av. Abund. | D<br>Av. Abund. | Av.<br>Diss. | Contrib.<br>% | Cum.% |
| <i>Euphausia calyptopis</i>                    | 0.49            | 2.08            | 5.56         | 11.30         | 11.30 |
| <i>Calanoides acutus</i>                       | 0.96            | 2.33            | 4.73         | 9.61          | 20.91 |
| <i>Metridia gerlachei</i>                      | 2.30            | 3.47            | 4.65         | 9.45          | 30.37 |

|                        |      |      |      |      |       |
|------------------------|------|------|------|------|-------|
| Cirriped nauplius      | 1.80 | 0.09 | 4.60 | 9.34 | 39.70 |
| <i>Oithona</i> spp.    | 1.23 | 0.27 | 3.26 | 6.62 | 46.33 |
| <i>Limacina rangii</i> | 0.18 | 1.04 | 2.95 | 5.59 | 52.32 |

---

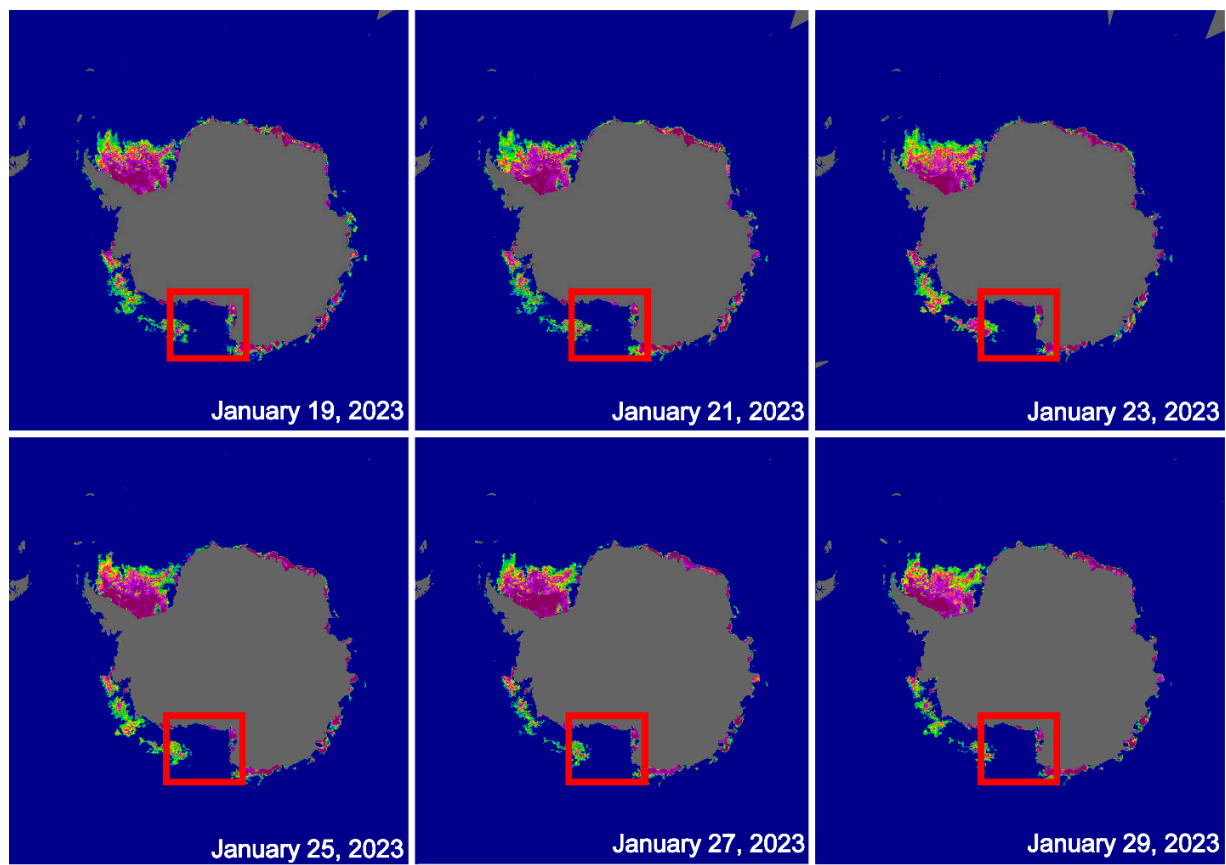

**Figure S1.** Sea ice concentration from January 19, 2023 to January 29, 2023 derived from AMSR-E/AMSR2.
